# Supplementary material
Source: PubMed Central journal article supplement (PMC3430546)
Supplement: supp_112.141754_FigureS3.pdf [file supp_112.141754_FigureS3.pdf]

3. Your original cell (in question 1) now enters into **meiosis**.  
 Draw your cell at the following stages:

- metaphase I
- telophase I/cytokinesis
- metaphase II
- telophase II/cytokinesis.

Label your model identifying sister chromatids, homologous chromosomes, and synapsis.  
 Use your model to explain independent assortment.

In metaphase, it doesn't matter which set of sister chromatids is pulled to which daughter cell. For example A could be with B or b.

Figure S3 Student completed cell division worksheet
